# Supplementary material for: Selective photo-reduction of CO2 to methanol using Cu-doped 1D-Bi2S3/rGO nanocomposites under visible light irradiation
Source: Royal Society of Chemistry journal article supplement (doi:10.1039/d2nj03892g), 2022-11-29
Supplement: d2nj03892g1.pdf [file d2nj03892g1.pdf]

Electronic Supplementary Material (ESI) for New Journal of Chemistry. This journal is © The Royal Society of Chemistry and the Centre National de la Recherche Scientifique 2022

## Supporting Information

### Selective photo-reduction of CO<sub>2</sub> to methanol using Cu doped 1D-Bi<sub>2</sub>S<sub>3</sub>/rGO nanocomposite under visible light irradiation

Arindam Mandal,<sup>a</sup> Soumyajit Maitra,<sup>b</sup> Subhasis Roy,<sup>b</sup> Baisakhi Hazra,<sup>b</sup> Koustuv Ray<sup>c</sup> and Kajari Kargupta<sup>a\*</sup>

<sup>a</sup>Chemical Engineering Department, Jadavpur University, Kolkata, 700032, India.

<sup>b</sup>Chemical Engineering Department, Calcutta University, Kolkata, India.

<sup>c</sup>Department of Chemical Engineering, Indian Institute of Technology Kharagpur, West Bengal, India.

\*E-mail:karguptakajari2011@gmail.com.

### Content

1. The EDX analysis of (2%) Cu-BSNC/rGO [(2 wt%) Cu doped Bi<sub>2</sub>S<sub>3</sub>/rGO].....S1
2. GCMS analysis image of BSNC [Bi<sub>2</sub>S<sub>3</sub> rod-shaped nanocapsules].....S2 (a)
3. GCMS analysis image of BSNC/rGO [Bi<sub>2</sub>S<sub>3</sub>/rGO].....S2 (b)
4. GCMS analysis images of (1%) Cu-BSNC/rGO [(1 wt%)Cu doped Bi<sub>2</sub>S<sub>3</sub>/rGO].....S2 (c) & S2 (d)
5. GCMS analysis image of (1%) Cu-BSNC..... S2 (e)
6. Apparent Quantum Yield (AQY) calculation for 1% Cu-BSNC/rGO (1%Cu doped Bi<sub>2</sub>S<sub>3</sub>/rGO)..... S3

1. The EDX analysis of (2%) Cu-BSNC/rGO [(2 wt%) Cu doped Bi<sub>2</sub>S<sub>3</sub>/rGO]

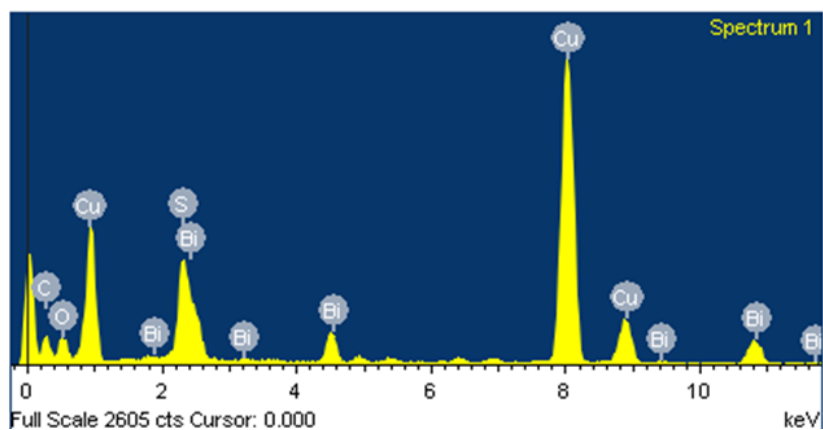

Fig. S1 EDX analysis of (2%) Cu-BSNC/rGO [(2 wt%) Cu doped Bi<sub>2</sub>S<sub>3</sub>/rGO]

2. GCMS analysis image of BSNC [Bi<sub>2</sub>S<sub>3</sub> rod-shaped nanocapsules]

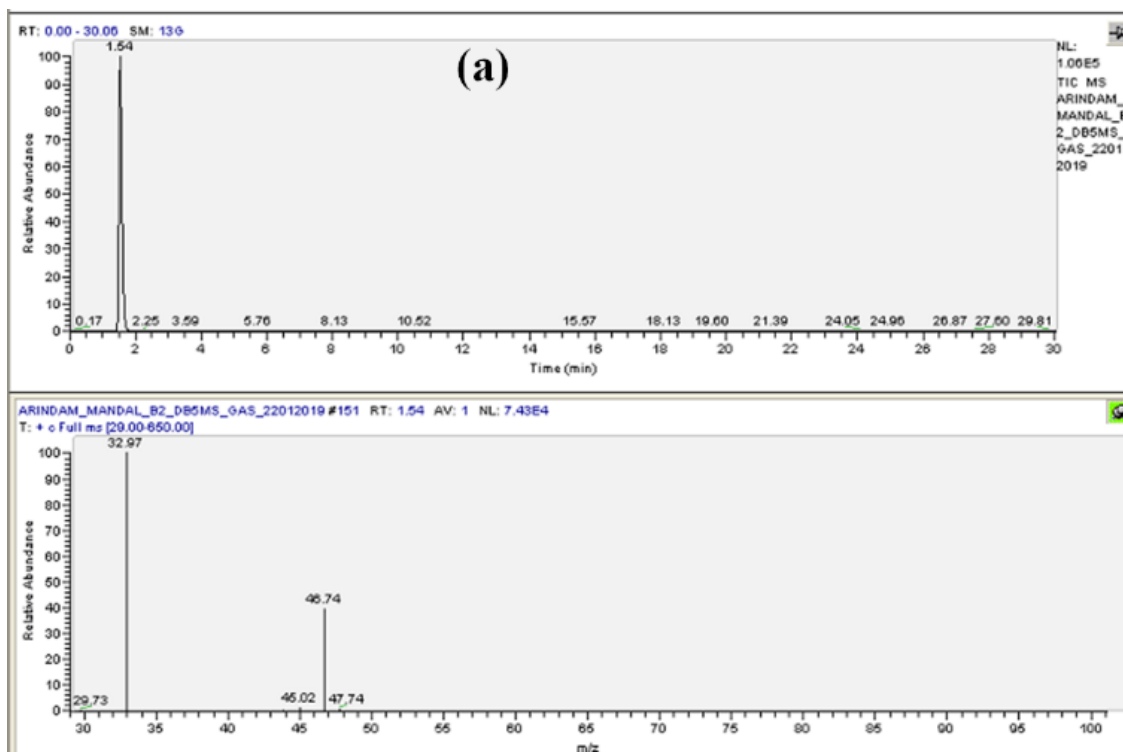

Fig. S2(a) GCMS analysis image of BSNC [Bi<sub>2</sub>S<sub>3</sub> rod-shaped nanocapsules].

3. GCMS analysis image of BSNC/rGO [Bi<sub>2</sub>S<sub>3</sub>/rGO]

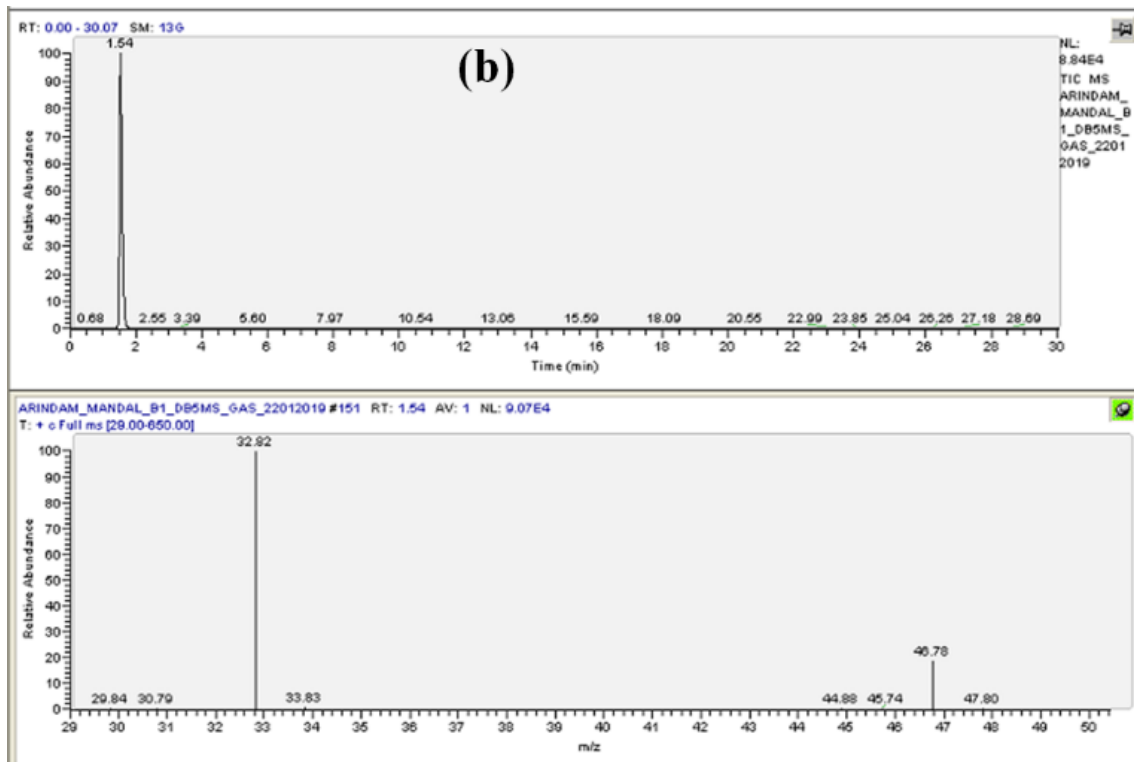

Fig. S2(b) GCMS analysis image of BSNC/rGO [Bi<sub>2</sub>S<sub>3</sub>/rGO]

4. GCMS analysis images of (1%) Cu-BSNC/rGO [(1 wt%)Cu doped Bi<sub>2</sub>S<sub>3</sub>/rGO]

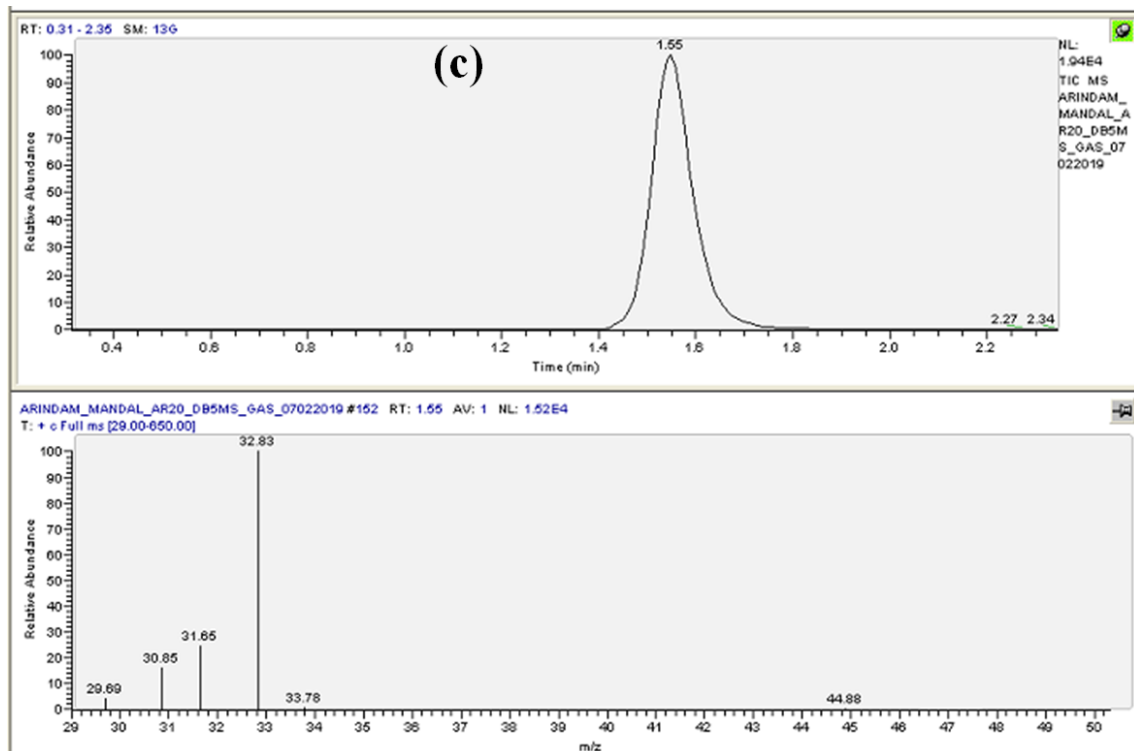

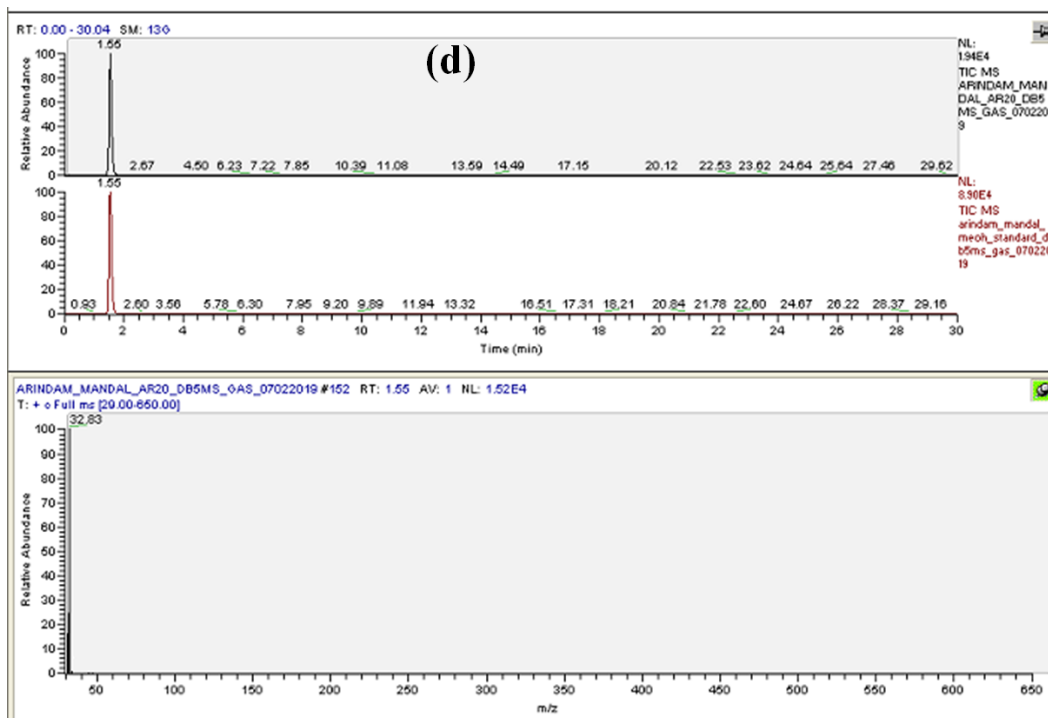

Fig. S2(c) & (d) GCMS analysis images of (1%) Cu-BSNC/rGO [(1 wt%)Cu doped Bi<sub>2</sub>S<sub>3</sub>/rGO]

#### 5. GCMS analysis image of (1 wt%) Cu-BSNC

The photocatalytic activity study of (1%) Cu-BSNC is also performed for comparison purpose; GCMS analysis detects both methanol, formic acid as photocatalytic CO<sub>2</sub> reduced products in liquid phase. In this study Methanol and formic acid formation are clearly identified by the value of m/z=32.76 & m/z=46.78, respectively, at retention time 1.50 min.

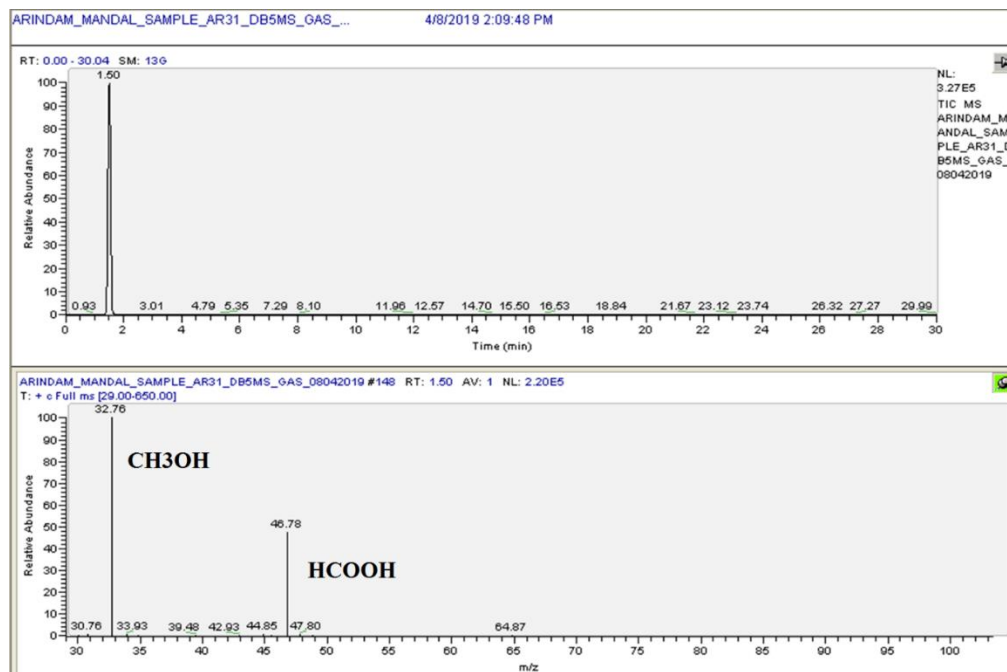

Fig. S2 (e) GCMS analysis image of (1%) Cu-BSNC.

6. Apparent Quantum Yield (AQY) calculation for 1% Cu-BSNC/rGO (1%Cu doped Bi<sub>2</sub>S<sub>3</sub>/rGO):

Apparent quantum yield (AQY) is defined as the ratio of number of reacted electrons to the number of incident photons. [Reference (59) -J. Am. Chem. Soc. 2020,142, 4862–4871]

$$AQY = \frac{\text{Number of reacted electrons}}{\text{Number of incident photons}} \times 100 \dots\dots\dots (1)$$

As given in equation (1), during the photocatalytic reduction of CO<sub>2</sub>, stoichiometrically 6 electrons are required to produce one molecule of CH<sub>3</sub>OH.

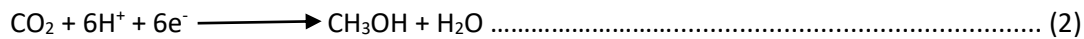

Therefore, number of reacted electrons can be calculated by directly multiplying 6 with mole of CH<sub>3</sub>OH produced during the photocatalytic reaction.

$$\text{Number of reacted electrons} = [CH_3OH] \times 6 \times N_A \dots\dots\dots (3)$$

where [CH<sub>3</sub>OH] = mole of CH<sub>3</sub>OH produced in time (t) & N<sub>A</sub> = Avogadro's number (6.022 × 10<sup>23</sup> mol<sup>-1</sup>)

[CH<sub>3</sub>OH] = 215.174 μmol g<sup>-1</sup> h<sup>-1</sup> at 420 nm, where t = 10h.

Therefore,

$$\text{Number of reacted electrons} = 215.174 \times 10^{-6} \times 6 \times 6.022 \times 10^{23} = 7.775 \times 10^{20}$$

$$\text{Now, Number of photons} = \frac{\text{Light absorbed by the photocatalyst}}{\text{The average photon energy}} \times t \dots\dots\dots (4)$$

where; t = time taken for the reaction

$$\text{Light absorbed by the photocatalyst} = E \times A$$

$$E = \text{Input from the source of the light} = 37.5 \text{ mW/cm}^2 = 375 \text{ W/m}^2$$

$$A = 16.81 \text{ cm}^2$$

$$\text{Light absorbed by the photocatalyst} = 375 \times 0.001681 = 0.630375 \text{ J/sec}$$

$$\text{The average photon energy} = hc/\lambda$$

$$h = \text{Planck's Constant} = 6.626 \times 10^{-34} \text{ J.sec}; \quad c = \text{velocity of light} = 3 \times 10^8 \text{ m/sec}$$

$$\lambda = \text{Maximum emission wavelength for the spectrum of the source} = 420 \text{ nm} = 420 \times 10^{-9} \text{ m}$$

$$\text{The average photon energy} (hc/\lambda) = 4.7329 \times 10^{-19}$$

Therefore,

$$\text{Number of incident photons} = (0.630375 / 4.7329 \times 10^{-19}) \times 36000 \text{ [using equation (4)]}$$

$$= 4.795 \times 10^{22} \text{ photons}$$

$$AQY = (7.775 \times 10^{20} / 4.795 \times 10^{22}) \times 100 = \mathbf{1.62\%}$$
